# Supplementary material for: Providing choice of feedback affects perceived choice but does not affect performance
Source: PeerJ. 2022 Jun 28;10:e13631. doi: 10.7717/peerj.13631 (PMC9248777; doi:10.7717/peerj.13631)
Supplement: Supplemental Information 3 [file peerj-10-13631-s003.xlsx]

## Sheet: Sheet1
id	group	choice	famil_RT	famil_correct	pre_RT_switch	pre_RT_no_switch	pre_correct_switch	pre_correct_no_switch	pre_RT	pre_correct	mean_pre_correct	1_RT_switch	1_RT_no_switch	1_RT	2_RT_switch	2_RT_no_switch	2_RT	3_RT_switch	3_RT_no_switch	3_RT	4_RT_switch	4_RT_no_switch	4_RT	5_RT_switch	5_RT_no_switch	5_RT	1_correct_switch	1_correct_no_switch	1_correct	2_correct_switch	2_correct_no_switch	2_correct	3_correct_switch	3_correct_no_switch	3_correct	4_correct_switch	4_correct_no_switch	4_correct	5_correct_switch	5_correct_no_switch	5_correct	mean_correct_switch	mean_correct_no_switch	mean_correct	post_RT_switch	post_RT_no_switch	post_correct_switch	post_correct_no_switch	post_RT
5358619	1		2556.55	7	2476.69	3331.63	12	12	2904.16	24	12	1164.47	1069.37	1116.92	1306.02	872.917	1089.47	1185.34	882.308	1033.83	1266.8	920.058	1093.43	1438.88	778.142	1108.51	12	12	24	12	11	23	12	12	24	12	12	24	12	12	24	12	11.8	23.8	1177.67	1292.97	11	12	1235.32
5358666	1		1617.88	8	2676.75	1949.92	10	8	2313.33	18	9	1431.5	789.833	1110.67	1494.33	1062.58	1278.46	1349.92	1051.58	1200.75	1691.75	1044.92	1368.33	1806.08	946.917	1376.5	11	12	23	11	10	21	12	12	24	11	12	23	12	12	24	11.4	11.6	23	1565.08	1026.08	12	12	1295.58
5358688	1		1576.22	8	1108.21	690.636	12	12	899.424	24	12	1065.9	851.335	958.617	783.465	675.951	729.708	950.258	852.214	901.236	973.058	663.89	818.474	700.678	752.18	726.429	12	11	23	12	11	23	12	10	22	11	12	23	11	12	23	11.6	11.2	22.8	855.031	1282.46	11	12	1068.75
5358699	1		1869.11	4	1723.44	1045.29	12	11	1384.37	23	11.5	1334.97	952.492	1143.73	930.217	869.858	900.038	1076.27	765.408	920.837	1092.48	869.408	980.942	1425.02	2030.86	1727.94	12	12	24	12	12	24	12	12	24	12	12	24	12	12	24	12	12	24	1202.03	1006.62	12	12	1104.33
5358702	1		2106.44	6	1583.97	1394.03	12	12	1489	24	12	1138.89	1179.31	1159.1	1031.63	976.358	1003.99	1036.82	1029.17	1033	952.542	788.6	870.571	1046.02	809.133	927.575	12	12	24	11	12	23	11	12	23	12	12	24	12	12	24	11.6	12	23.6	1066.43	711.367	12	12	888.9
5358704	1		1977.29	4	1551.15	1430.41	8	6	1490.78	14	7	2024	1258.88	1641.44	1758.86	684.975	1221.92	1465.46	821.5	1143.48	1710.54	798.383	1254.46	1335.21	468.608	901.908	8	6	14	11	7	18	11	10	21	12	10	22	11	11	22	10.6	8.8	19.4	2663.95	1028.23	12	12	1846.09
5358732	1		1626.5	6	1052.25	928.083	12	12	990.167	24	12	798.833	951	874.917	779.917	638.083	709	882	779.667	830.833	880.25	727	803.625	740.25	688.083	714.167	12	12	24	12	11	23	12	12	24	12	11	23	12	12	24	12	11.6	23.6	932.333	658.917	12	12	795.625
5358735	1		955.5	5	768.5	799.25	6	9	783.875	15	7.5	926.667	688.833	807.75	820.417	749.5	784.958	855.333	644.583	749.958	1096.58	711.75	904.167	849.333	534.167	691.75	10	11	21	12	12	24	11	12	23	11	12	23	12	12	24	11.2	11.8	23	973.583	724.75	9	10	849.167
5358756	1		1238.54	8	1572.27	1141.88	10	11	1357.07	21	10.5	1675	717.767	1196.38	1369.27	943.108	1156.19	1450.75	822.142	1136.45	2305.12	1259.59	1782.35	1184.22	579.1	881.658	11	11	22	12	12	24	12	11	23	11	11	22	12	12	24	11.6	11.4	23	1110.19	628.033	12	12	869.113
5358774	1		799.125	8	925.517	488.792	12	12	707.154	24	12	742.833	572.6	657.717	856.242	464.775	660.508	760.833	478.517	619.675	808.083	581.042	694.563	771.5	495.875	633.687	12	12	24	12	11	23	11	12	23	12	11	23	12	11	23	11.8	11.4	23.2	783.75	645.375	12	11	714.563
5358790	1		1839.12	6	1627.5	1018.5	11	12	1323	23	11.5	1019.67	773.917	896.792	1055.08	762.917	909	1040	772.25	906.125	1220.08	787	1003.54	1000.25	867.833	934.042	12	12	24	11	12	23	12	12	24	12	11	23	12	12	24	11.8	11.8	23.6	995.083	854	12	12	924.542
5358794	1		1078.14	8	929.292	601.458	12	12	765.375	24	12	742.742	686.092	714.417	810.742	538.625	674.683	797.292	583.958	690.625	858.125	751.55	804.837	792.283	568.433	680.358	12	12	24	12	12	24	12	12	24	11	12	23	12	12	24	11.8	12	23.8	933.708	788.783	11	12	861.246
5358831	1		1441.75	8	1622.82	845.95	11	10	1234.39	21	10.5	916.917	706.633	811.775	1067.87	540.9	804.383	1086.79	762.617	924.704	910.975	775.658	843.317	1203.12	701.075	952.1	11	11	22	12	9	21	12	10	22	12	12	24	11	12	23	11.6	10.8	22.4	1219.93	860.483	12	11	1040.2
5358837	1		2736.99	3	2557.62	1572.85	12	11	2065.23	23	11.5	1420.28	1433.54	1426.91	1535.54	1245.03	1390.29	1506.1	1406.07	1456.08	1539.83	1311.62	1425.72	1422.15	1382.27	1402.21	12	11	23	12	12	24	12	12	24	12	12	24	12	12	24	12	11.8	23.8	1779.22	1449.75	12	12	1614.48
5358855	1		781.15	5	806.967	804.958	10	11	805.963	21	10.5	1042.03	964.717	1003.38	949.35	759.533	854.442	807.5	710.683	759.092	1027.54	803.1	915.321	936.608	1047.07	991.837	10	8	18	12	8	20	9	10	19	10	9	19	11	11	22	10.4	9.2	19.6	893.092	797.308	12	12	845.2
5358858	1		1308.52	7	1138.94	1002.84	11	12	1070.89	23	11.5	900.317	905.558	902.938	908.425	689.45	798.938	811.683	976.6	894.142	1300.72	876.808	1088.76	1316.93	743.725	1030.33	10	12	22	12	11	23	9	12	21	10	9	19	12	11	23	10.6	11	21.6	916.492	694.567	11	12	805.529
5358867	1		4723	6	1602.17	1039.17	12	12	1320.67	24	12	1095.08	723.083	909.083	1146.58	614.583	880.583	941.333	657.75	799.542	880	577	728.5	962.833	745.25	854.042	12	12	24	12	12	24	12	12	24	12	12	24	12	12	24	12	12	24	1142.25	827.333	11	12	984.792
5358885	1		1364.55	8	1507.51	1007.73	12	12	1257.62	24	12	1174.17	663.592	918.883	1070.26	601.483	835.871	1343.82	769.175	1056.5	1330.7	773.85	1052.28	1163.09	698.85	930.971	12	11	23	12	12	24	12	12	24	12	11	23	12	12	24	12	11.6	23.6	1495.75	773.025	12	12	1134.39
5358895	1		1441.52	6	1686.33	1461.34	12	12	1573.83	24	12	1531.78	1231.3	1381.54	1036.11	1319.49	1177.8	1340.41	754.067	1047.24	1035.43	628.933	832.179	1087.62	572	829.808	12	12	24	11	12	23	11	10	21	12	12	24	12	12	24	11.6	11.6	23.2	1477.28	882.533	12	12	1179.91
5358926	1		1758.18	5	1091.43	1149.21	5	8	1120.32	13	6.5	1077.02	812.175	944.596	504.15	624.675	564.412	464.617	461.083	462.85	170.792	117.983	144.388	53.9583	60.1667	57.0625	9	5	14	8	7	15	6	5	11	5	4	9	6	6	12	6.8	5.4	12.2	362.125	307.167	6	7	334.646
5358930	1		882.837	3	855.425	955.133	7	7	905.279	14	7	790.217	736.733	763.475	585.975	644.708	615.342	611.175	499.85	555.512	595.117	662.05	628.583	483.733	568.017	525.875	8	8	16	9	9	18	8	8	16	9	9	18	8	6	14	8.4	8	16.4	653.717	716.375	9	11	685.046
5358939	1		876.612	8	1639.8	807.317	12	11	1223.56	23	11.5	1041.07	683.892	862.483	1079.1	752.333	915.717	1281.67	648.733	965.2	914.617	549.975	732.296	1497.93	502.867	1000.4	12	11	23	12	12	24	12	11	23	12	12	24	11	12	23	11.8	11.6	23.4	1201.23	780.258	12	12	990.746
5358940	1		1185.88	8	1301.12	715.433	12	11	1008.27	23	11.5	895.775	788.792	842.283	866.7	745.767	806.233	776.975	683.483	730.229	887.283	572.425	729.854	814.892	654.867	734.879	12	12	24	12	12	24	12	12	24	12	11	23	12	12	24	12	11.8	23.8	872.233	665.842	12	12	769.037
5358952	1		1550.99	6	1616.78	1176.12	10	11	1396.45	21	10.5	1192.24	622.875	907.558	1179.37	678.292	928.829	1224.83	1261.83	1243.33	1269.89	947.467	1108.68	1181.07	887.017	1034.04	12	12	24	12	10	22	11	12	23	11	11	22	12	12	24	11.6	11.4	23	1129.08	957.242	12	12	1043.16
5358955	1		1237.66	5	1618.26	987.8	12	12	1303.03	24	12	1409.38	718.842	1064.11	1435.54	739.908	1087.72	1272.89	673.1	972.996	1529.52	727.383	1128.45	1096.42	751.283	923.854	11	12	23	12	12	24	12	12	24	12	11	23	12	12	24	11.8	11.8	23.6	1148.22	917.7	12	12	1032.96
5358958	1		1092.8	3	1609.58	1400.47	11	12	1505.02	23	11.5	1488.14	720.142	1104.14	1441.28	916.133	1178.7	1036.79	997.925	1017.36	1497.62	954.65	1226.13	1320.88	969.725	1145.3	12	12	24	11	11	22	12	12	24	11	12	23	12	11	23	11.6	11.6	23.2	1606.31	858.1	12	12	1232.2
5358962	1		2529.41	7	2057.59	2099.34	11	10	2078.47	21	10.5	1469.18	835.8	1152.49	1298.49	871.625	1085.06	1295.28	709.433	1002.36	1079.7	646.7	863.2	1167.73	807.792	987.763	11	12	23	11	11	22	12	11	23	12	11	23	12	12	24	11.6	11.4	23	1335.23	958.75	12	12	1146.99
5358966	1		1367.88	7	1739.83	1451.33	8	12	1595.58	20	10	1314.83	1063.5	1189.17	1108.33	969.833	1039.08	1299.5	831.25	1065.38	1112.75	835.417	974.083	1142.83	920.417	1031.63	11	12	23	12	11	23	12	11	23	12	11	23	11	12	23	11.6	11.4	23	1289.67	957.5	12	11	1123.58
5358972	1		1899.63	8	1827.92	892.75	12	12	1360.33	24	12	1364.92	923.25	1144.08	1235.17	1029.33	1132.25	1215.83	1275.42	1245.62	1572.08	1170.33	1371.21	1391	1671.83	1531.42	12	11	23	12	11	23	11	11	22	9	12	21	12	12	24	11.2	11.4	22.6	2186	952.75	12	12	1569.38
5358974	1		875.25	8	1106.92	848.833	11	12	977.875	23	11.5	1513.08	951.167	1232.12	1044.33	784.167	914.25	860.167	712	786.083	1005.5	849	927.25	860.417	816.917	838.667	11	11	22	12	12	24	11	10	21	11	11	22	12	11	23	11.4	11	22.4	890.167	682.5	11	12	786.333
5358976	1		3343	5	4264.08	2720.33	12	12	3492.21	24	12	2822.25	1925.75	2374	1636.25	1488.75	1562.5	1576.92	1513.08	1545	1593.25	1696.08	1644.67	2065.75	2600.67	2333.21	11	12	23	12	12	24	12	11	23	12	12	24	12	12	24	11.8	11.8	23.6	1684.33	1939.17	12	12	1811.75
5358981	1		1719.93	8	1501.61	1067.66	10	11	1284.63	21	10.5	1004.99	685.067	845.029	1004.25	715.383	859.817	1381.09	886.35	1133.72	1320.91	780.433	1050.67	1133.55	641.125	887.337	12	12	24	12	11	23	11	12	23	12	12	24	12	12	24	11.8	11.8	23.6	1386.22	859.242	12	12	1122.73
5358984	1		2021.96	6	1448.55	1490.74	9	9	1469.65	18	9	1068.03	1314.36	1191.2	999.383	1036.24	1017.81	836.258	945.025	890.642	911.567	867.15	889.358	806.65	825.842	816.246	7	9	16	9	7	16	10	9	19	8	10	18	9	9	18	8.6	8.8	17.4	1283.33	1362.59	8	8	1322.96
5358986	1		2117.75	8	1756.92	1804.92	10	12	1780.92	22	11	1621.08	1232.83	1426.96	1367	1235.75	1301.37	1265.5	1208.5	1237	1493.17	1212.17	1352.67	1140.92	818	979.458	12	12	24	12	12	24	12	12	24	12	11	23	12	12	24	12	11.8	23.8	1136.25	1182.42	12	12	1159.33
5358999	1		2635.06	4	660.083	295.933	5	6	478.008	11	5.5	2965.86	1229.62	2097.74	1362.54	1034.25	1198.4	1400.68	1195.6	1298.14	1685.38	1568.17	1626.77	1370.09	865.733	1117.91	12	12	24	12	11	23	12	12	24	12	12	24	12	12	24	12	11.8	23.8	1440.11	1027.51	12	12	1233.81
5359001	1		1383.16	8	1594.52	1501.69	12	10	1548.1	22	11	1159.16	707.625	933.392	1361.85	650.175	1006.01	1542.08	651.025	1096.55	1137.35	901.45	1019.4	1126.38	658.725	892.554	12	12	24	12	11	23	11	12	23	12	11	23	11	12	23	11.6	11.6	23.2	1165.34	713.183	11	12	939.262
5359002	1		782.298	4	1601.66	1049.86	12	11	1325.76	23	11.5	1315.96	845.615	1080.79	1031.6	793.78	912.688	993.073	730.542	861.807	1176.7	994.729	1085.72	1066.93	596.904	831.919	12	12	24	12	12	24	12	12	24	12	12	24	12	12	24	12	12	24	1188.93	696.759	12	12	942.844
5359008	1		1036.13	8	1736.61	1088.91	9	11	1412.76	20	10	1239.54	715.625	977.583	1123.24	728.175	925.708	954.133	521.725	737.929	1164.22	688.108	926.167	1043.56	610.15	826.854	11	12	23	12	12	24	11	12	23	12	11	23	12	12	24	11.6	11.8	23.4	860.225	638.417	12	12	749.321
5359009	1		1085.5	3	1604.29	1066.83	9	8	1335.56	17	8.5	996.233	807.742	901.988	904.75	873.008	888.879	860.142	987.675	923.908	1031.75	791.017	911.383	797.325	989.45	893.388	10	11	21	11	11	22	9	12	21	9	12	21	11	12	23	10	11.6	21.6	1075.88	811.717	12	11	943.8
5359020	1		1710	7	2017.08	1426.5	11	12	1721.79	23	11.5	1491.25	1002.67	1246.96	1575.42	909.5	1242.46	1567.42	895.667	1231.54	1398	897	1147.5	1611	1093.17	1352.08	11	12	23	11	11	22	11	11	22	12	12	24	12	12	24	11.4	11.6	23	1587.42	959.25	12	12	1273.33
5359025	1		1373.12	4	1767.67	1700.25	11	11	1733.96	22	11	1873.92	1408.83	1641.38	1257.92	775.667	1016.79	1353.92	912.667	1133.29	1154.33	840.5	997.417	1130.92	975.25	1053.08	11	10	21	12	12	24	12	11	23	11	12	23	12	11	23	11.6	11.2	22.8	1405	1076.67	12	12	1240.83
5359028	1		1239.25	7	1011	816.25	12	12	913.625	24	12	829.417	526.583	678	1174.67	543.5	859.083	1060	697.417	878.708	751	639.333	695.167	739.583	597.75	668.667	12	12	24	12	7	19	11	12	23	12	12	24	11	10	21	11.6	10.6	22.2	764.667	619.417	10	12	692.042
5359036	1		1353.61	6	1998.93	2072.85	10	8	2035.89	18	9	1836.14	1809.22	1822.68	1366.99	1361.73	1364.36	1340.07	1228.88	1284.47	1415.59	984.583	1200.09	1654.1	1102.1	1378.1	12	12	24	12	12	24	12	12	24	12	12	24	12	12	24	12	12	24	1088.74	1529.6	12	12	1309.17
5359037	1		1012.56	5	1779.84	1715.55	10	12	1747.7	22	11	1587.62	1207.62	1397.62	1352.34	847.625	1099.98	1368.62	868.033	1118.32	1366.8	941.342	1154.07	963.575	676.592	820.083	10	12	22	12	11	23	11	11	22	12	11	23	11	10	21	11.2	11	22.2	1273.56	820.183	10	12	1046.87
5359045	1		1778.52	8	1560.07	1225.93	10	12	1393	22	11	1303.51	842.108	1072.81	1137.76	757.067	947.412	1163.57	714.1	938.833	1293.27	976.092	1134.68	1607.1	1521.9	1564.5	12	12	24	12	12	24	12	11	23	12	12	24	12	10	22	12	11.4	23.4	1084.3	981.033	12	12	1032.67
5359055	1		2895.79	2	2770.63	2302.54	12	12	2536.59	24	12	1998.41	1312.52	1655.46	1632.72	1070.42	1351.57	1881.8	1238.83	1560.31	2063.15	1168.28	1615.72	1663.02	1073.8	1368.41	12	12	24	11	11	22	12	12	24	12	12	24	12	11	23	11.8	11.6	23.4	1414.98	1046.32	12	12	1230.65
5359130	1		1399.84	4	1520.48	1322.77	9	7	1421.63	16	8	1277.06	1327.4	1302.23	893.908	1014.86	954.383	858.492	840.192	849.342	960.442	1128.49	1044.47	910.692	1032.27	971.479	8	8	16	10	8	18	10	8	18	8	10	18	9	8	17	9	8.4	17.4	1160.73	1044.09	11	11	1102.41
5359158	1		1461.97	7	2026.81	1241.58	9	9	1634.2	18	9	1464.73	853.042	1158.89	1139.24	759.208	949.225	1138.89	942.233	1040.56	1261.58	791.575	1026.58	1155.87	593.975	874.921	11	12	23	12	12	24	11	12	23	11	12	23	11	12	23	11.2	12	23.2	1136.63	737.45	11	12	937.038
5359167	1		1018.85	8	1085.16	1070.95	11	12	1078.05	23	11.5	749.708	827.7	788.704	827.442	671.792	749.617	1011.24	730.85	871.046	869.4	728.125	798.762	876.358	923.425	899.892	11	12	23	12	10	22	12	12	24	11	12	23	11	12	23	11.4	11.6	23	861.025	762.9	12	12	811.963
5358652	2		1612.72	8	1244.75	871.8	12	12	1058.28	24	12	934.783	676.942	805.863	1054.39	783.008	918.7	973.175	625.808	799.492	1029.79	663.9	846.846	840.483	638.6	739.542	12	12	24	11	12	23	12	11	23	12	12	24	12	12	24	11.8	11.8	23.6	837.217	585.158	12	11	711.187
5358668	2		1699.55	7	1411.2	1164.25	12	12	1287.72	24	12	1273.38	866.792	1070.08	1372.24	969.233	1170.74	1015.62	761.367	888.492	1364.32	847.158	1105.74	1836.11	1070.07	1453.09	12	12	24	12	11	23	12	12	24	9	12	21	12	12	24	11.4	11.8	23.2	1205.63	707.992	12	12	956.812
5358670	2		1290	7	1465	911.333	12	12	1188.17	24	12	1071.67	669	870.333	1202.75	598.167	900.458	1145.92	598.667	872.292	1091.5	619.25	855.375	1058.17	578.167	818.167	12	12	24	12	12	24	12	12	24	12	12	24	12	12	24	12	12	24	1139.08	834.083	12	12	986.583
5358691	2		2259.3	5	1801.08	1159.54	11	12	1480.31	23	11.5	1588.26	975.317	1281.79	1658.33	840.767	1249.55	1617.57	828.392	1222.98	1272.49	1006.48	1139.48	1614.89	599.292	1107.09	11	12	23	12	11	23	12	12	24	12	12	24	12	12	24	11.8	11.8	23.6	2743.34	1705.81	12	12	2224.58
5358712	2		1236.53	6	2441.45	1569.77	10	10	2005.61	20	10	1051	880.817	965.908	1130.12	817.908	974.012	977.625	857.358	917.492	996.317	773.067	884.692	1027.58	618.95	823.267	12	11	23	11	12	23	11	11	22	10	11	21	12	12	24	11.2	11.4	22.6	1575.45	883.558	12	11	1229.5
5358716	2		1935.15	5	2602.91	1691.61	12	12	2147.26	24	12	1827.5	1202.69	1515.1	2721.77	971.133	1846.45	2233.44	1106.3	1669.87	1597.52	961.775	1279.65	1542.68	1062.73	1302.7	12	12	24	12	10	22	12	11	23	12	12	24	12	12	24	12	11.4	23.4	1813.79	1391.43	12	12	1602.61
5358720	2		1825.62	5	1591.11	1167.34	6	9	1379.23	15	7.5	1413.78	1058.04	1235.91	1123.76	1050.52	1087.14	1636.96	776.425	1206.69	1444.25	1032.88	1238.57	1380.93	1431.26	1406.1	9	11	20	10	12	22	11	11	22	10	12	22	12	12	24	10.4	11.6	22	1143.34	874.6	12	12	1008.97
5358727	2		1112.13	8	1288.75	1059	11	7	1173.88	18	9	2171.92	1021	1596.46	1444.17	1151.08	1297.63	1660	1053.33	1356.67	1592.67	888.833	1240.75	804.917	741.083	773	12	12	24	11	10	21	11	10	21	9	11	20	9	12	21	10.4	11	21.4	1068.58	798.667	9	12	933.625
5358751	2		1801.72	4	1402.09	1036.88	11	12	1219.49	23	11.5	1096.52	820.033	958.275	1014.68	837.542	926.112	1066.44	858.958	962.7	1142.03	915.142	1028.59	976.467	1055.92	1016.2	12	12	24	12	12	24	12	12	24	11	11	22	10	11	21	11.4	11.6	23	1351.33	1215.68	10	11	1283.5
5358770	2		3926.25	6	2496.08	2329	9	10	2412.54	19	9.5	1435.42	971.333	1203.38	964.417	722.75	843.583	1319.75	1000.42	1160.08	961.917	766.5	864.208	963.917	850.667	907.292	11	12	23	12	12	24	12	9	21	12	11	23	11	12	23	11.6	11.2	22.8	1125.5	725.083	12	12	925.292
5358776	2		1605.14	8	1101.93	766.725	12	11	934.329	23	11.5	942.358	661.892	802.125	856.992	765.517	811.254	928.392	641.992	785.192	813.008	604.683	708.846	972.583	643.625	808.104	10	10	20	12	11	23	12	10	22	10	12	22	11	12	23	11	11	22	903.05	575.95	12	12	739.5
5358801	2		1199.29	8	1329.42	846.083	12	12	1087.75	24	12	1343.84	870.233	1107.04	1449.18	940.433	1194.81	1524.24	960	1242.12	1408.77	605.325	1007.05	1319.8	704.642	1012.22	12	12	24	12	11	23	10	11	21	11	12	23	12	12	24	11.4	11.6	23	1473.2	647.083	12	12	1060.14
5358806	2		1731.71	6	2844.86	2784.53	10	8	2814.7	18	9	2075.48	1113.41	1594.44	1880.28	1460.64	1670.46	2665.09	1441.45	2053.27	1279.96	824.35	1052.15	1689.73	662	1175.87	11	12	23	7	7	14	10	9	19	11	6	17	11	12	23	10	9.2	19.2	2476.34	1670.39	8	8	2073.37
5358819	2		3754.53	8	2748.55	2504.83	9	10	2626.69	19	9.5	2203.75	2104.02	2153.88	1923.63	2034.58	1979.1	1980.28	1828.98	1904.63	1996.53	2079.22	2037.87	1791.71	1544.96	1668.33	9	10	19	10	11	21	10	11	21	11	12	23	12	12	24	10.4	11.2	21.6	1693.98	1659.48	12	11	1676.73
5358820	2		4187.13	8	1722.14	1625.91	12	12	1674.02	24	12	1060.53	680.333	870.429	1221.95	838.833	1030.39	1124.17	650.667	887.421	1191.02	875.258	1033.14	1299.85	625.158	962.504	12	12	24	11	12	23	12	12	24	11	12	23	12	12	24	11.6	12	23.6	1065.05	661.1	12	12	863.075
5358841	2		1025.06	8	955.225	805.925	12	12	880.575	24	12	889.183	671.617	780.4	872.3	718.55	795.425	915.525	807.842	861.683	843.292	616.242	729.767	925.8	672.55	799.175	10	10	20	11	10	21	11	12	23	12	12	24	11	12	23	11	11.2	22.2	1040.53	723.033	11	12	881.783
5358849	2		704.925	6	855.867	1031.67	9	9	943.767	18	9	829.575	695.042	762.308	666.433	596.533	631.483	738.575	684.033	711.304	662.025	691.292	676.658	726.8	603.142	664.971	11	11	22	12	10	22	10	9	19	10	10	20	11	10	21	10.8	10	20.8	835.692	861.333	11	12	848.513
5358859	2		3770.33	7	2987.64	2419.61	12	10	2703.63	22	11	2059.37	1523.53	1791.45	2436.84	1642.22	2039.53	2189.21	1317.89	1753.55	1852.88	1042.7	1447.79	2235.64	1159.43	1697.53	12	11	23	11	11	22	10	10	20	12	12	24	12	12	24	11.4	11.2	22.6	2020.03	1294.93	12	12	1657.48
5358881	2		1017.35	3	1152.41	1066.32	11	12	1109.36	23	11.5	752.15	664.408	708.279	881.2	603.517	742.358	905	672.592	788.796	807.458	629.175	718.317	827.608	609.133	718.371	11	12	23	12	10	22	12	11	23	11	11	22	11	12	23	11.4	11.2	22.6	914.508	636.083	11	12	775.296
5358884	2		2051.91	7	1492.67	1172.75	12	12	1332.71	24	12	1184.8	929.508	1057.15	883.025	731.992	807.508	850.108	867.392	858.75	927.8	837.65	882.725	885.075	824.867	854.971	11	12	23	12	12	24	11	12	23	10	12	22	12	10	22	11.2	11.6	22.8	935.85	1037.77	11	12	986.808
5358888	2		2603.95	8	1338.74	1099.39	12	12	1219.07	24	12	1232.02	677.583	954.8	1040.2	701.092	870.646	1343.83	990.608	1167.22	1170.25	891.083	1030.67	1015.28	745.958	880.621	12	12	24	12	12	24	10	12	22	12	12	24	12	12	24	11.6	12	23.6	1148.64	884.383	12	12	1016.51
5358905	2		1223.09	8	1156.72	767.7	12	12	962.213	24	12	1143.14	622.992	883.067	946.958	610.75	778.854	1008.55	633.158	820.854	997.142	672.792	834.967	1193.07	556.833	874.954	12	12	24	11	10	21	12	12	24	11	12	23	12	12	24	11.6	11.6	23.2	1094.68	567.892	12	11	831.283
5358912	2		1431.58	8	1150.65	851.558	12	12	1001.1	24	12	1047.08	837.633	942.358	855.425	759.725	807.575	964.575	837.35	900.963	1191.52	575.842	883.683	893.983	857.308	875.646	12	12	24	12	12	24	12	11	23	12	12	24	11	12	23	11.8	11.8	23.6	1151.67	1065.54	12	11	1108.6
5358925	2		2206.54	5	740.217	631.917	8	10	686.067	18	9	1918.96	1376.84	1647.9	1280.68	1284.42	1282.55	1232.15	1082.5	1157.33	1037.26	772.442	904.85	1358.87	1816.62	1587.74	9	11	20	9	9	18	8	8	16	7	11	18	8	8	16	8.2	9.4	17.6	982.25	869.558	8	11	925.904
5358941	2		1203.12	6	1071.58	849.583	10	11	960.583	21	10.5	911.25	684.583	797.917	933.917	728.167	831.042	1046	664	855	897.583	732.833	815.208	885.5	583.5	734.5	12	11	23	12	12	24	12	11	23	11	12	23	12	12	24	11.8	11.6	23.4	895.167	602.25	12	12	748.708
5358947	2		943.713	7	1146.25	1182.32	9	7	1164.28	16	8	1287.1	901.075	1094.09	1202.84	750.558	976.7	1317.6	930.433	1124.02	1284.73	744.35	1014.54	1446.54	754.925	1100.73	12	11	23	9	11	20	11	10	21	12	12	24	11	11	22	11	11	22	1691.23	1105.43	12	12	1398.33
5358950	2		1522.16	8	1552.16	1210.72	12	12	1381.44	24	12	1609.08	789.808	1199.45	1404.27	1208.68	1306.48	1273.62	972.967	1123.29	1833.12	739.483	1286.3	1731.87	926.475	1329.17	12	12	24	12	12	24	12	12	24	12	12	24	12	11	23	12	11.8	23.8	1210.98	1372.13	12	12	1291.56
5358953	2		1401.75	7	1123.75	938.833	12	12	1031.29	24	12	749.5	682.167	715.833	723.083	577.833	650.458	845.75	825.667	835.708	756.417	578.333	667.375	743.917	588.75	666.333	12	12	24	12	12	24	11	10	21	11	12	23	12	12	24	11.6	11.6	23.2	888.917	844.083	12	12	866.5
5358960	2		940.6	8	1281.18	940.367	11	11	1110.77	22	11	1280.37	1631.14	1455.75	1236.79	1312.46	1274.63	1214.59	1136.64	1175.62	1019.17	887.708	953.438	939.225	960.642	949.933	7	10	17	12	11	23	12	9	21	9	12	21	10	12	22	10	10.8	20.8	969.742	880	10	12	924.871
5358965	2		909.125	6	1392.34	1011.33	10	10	1201.84	20	10	1008.94	834.567	921.754	1192.68	846.15	1019.41	1101.01	776.417	938.713	852.708	757.667	805.188	871.783	854.65	863.217	9	12	21	10	8	18	11	10	21	10	11	21	10	11	21	10	10.4	20.4	953.575	713.308	12	10	833.442
5358969	2		1259.54	7	1935.66	1503.37	12	11	1719.52	23	11.5	2231.62	1885.57	2058.6	1719.82	1075.68	1397.75	1375.97	772.058	1074.01	2050.53	966.6	1508.56	1334.58	589.783	962.183	10	10	20	12	11	23	12	10	22	10	10	20	12	11	23	11.2	10.4	21.6	1522.26	1110.33	12	12	1316.3
5358983	2		1147.12	8	1457.58	1007.85	7	9	1232.72	16	8	1512.99	994.125	1253.56	1342.6	1071.1	1206.85	1420.25	971.208	1195.73	1207.54	1027.93	1117.74	1009.17	1034.56	1021.87	11	10	21	9	10	19	11	9	20	8	9	17	10	10	20	9.8	9.6	19.4	1337.27	1754.05	9	11	1545.66
5358988	2		1067.1	6	1365.95	1264.8	10	11	1315.38	21	10.5	1019.58	887.675	953.629	854.692	727.242	790.967	923.458	779.792	851.625	947.617	813.908	880.763	933.483	808.475	870.979	10	12	22	10	11	21	11	11	22	8	12	20	10	12	22	9.8	11.6	21.4	1094.98	845.992	10	12	970.487
5358989	2		1383.25	8	1322.42	952.167	11	11	1137.29	22	11	1030.17	807.5	918.833	921.333	864.083	892.708	929.667	968.417	949.042	1153.33	798.25	975.792	845.583	793.417	819.5	12	12	24	12	10	22	12	11	23	12	12	24	11	12	23	11.8	11.4	23.2	973.75	1148.75	11	12	1061.25
5358992	2		1576.69	8	1095.16	840.167	12	11	967.663	23	11.5	989.067	796.125	892.596	894	775.125	834.562	1062.12	854.2	958.158	937.167	755.933	846.55	897.775	848.417	873.096	12	11	23	12	12	24	11	11	22	12	11	23	10	12	22	11.4	11.4	22.8	997.925	1083.41	12	11	1040.67
5359004	2		8253.05	8	4296.94	3174.15	12	12	3735.55	24	12	3164.22	2091.83	2628.03	2052.17	1491.35	1771.76	3169.65	1515.77	2342.71	2489.79	2254.78	2372.29	1908.73	1283.93	1596.33	12	12	24	11	9	20	11	10	21	11	11	22	11	11	22	11.2	10.6	21.8	2199.56	1498.96	11	12	1849.26
5359006	2		1035.59	8	1284.36	893.875	12	11	1089.12	23	11.5	1064.24	869.775	967.008	1389.22	761.258	1075.24	971.492	767.083	869.288	1323.09	781.533	1052.31	1226.2	1070.93	1148.56	12	10	22	12	11	23	12	11	23	11	12	23	10	12	22	11.4	11.2	22.6	1222.81	920	11	12	1071.4
5359007	2		1099.66	5	869.55	903.075	10	7	886.312	17	8.5	772.858	908.325	840.592	695.208	715.683	705.446	418.242	387.275	402.758	543.583	580.858	562.221	512.792	479.333	496.063	7	6	13	9	8	17	6	5	11	4	5	9	8	5	13	6.8	5.8	12.6	724.8	745.008	8	10	734.904
5359015	2		880.762	5	1922.38	1853.14	10	9	1887.76	19	9.5	2141.1	1177.73	1659.42	1549.2	696.658	1122.93	1628.28	989.317	1308.8	1568.77	759.425	1164.1	1520.84	742.842	1131.84	9	10	19	12	11	23	11	11	22	10	11	21	11	12	23	10.6	11	21.6	1453.36	1228.18	11	11	1340.77
5359021	2		4435.54	6	2469.58	1378.74	11	11	1924.16	22	11	1670.63	1126.22	1398.43	1733.9	1198.84	1466.37	2209.69	1296.4	1753.05	24820.7	1339.01	13079.8	1714.72	1291.32	1503.02	11	12	23	11	11	22	12	12	24	9	12	21	12	11	23	11	11.6	22.6	1468.85	1591.64	10	12	1530.25
5359030	2		1678.05	8	1205.73	962.808	11	11	1084.27	22	11	1363.97	892.658	1128.32	1006.12	905.933	956.029	1301.58	1030.85	1166.21	1540.73	1061.79	1301.26	1512.92	1203.97	1358.45	12	11	23	10	10	20	11	10	21	9	10	19	10	12	22	10.4	10.6	21	2211.25	1375.53	11	12	1793.39
5359043	2		1453.6	6	1131.75	1035.01	12	12	1083.38	24	12	868.458	901.267	884.863	932.167	776.642	854.404	907.617	854.392	881.004	858.517	669.967	764.242	941.4	826.117	883.758	12	12	24	12	11	23	12	12	24	10	12	22	11	11	22	11.4	11.6	23	972.2	821.767	12	11	896.983
5359044	2		836.463	8	1483.1	1112.92	11	11	1298.01	22	11	1095.68	633.625	864.654	1112.23	508.642	810.437	1227.04	553.942	890.492	1033.25	532.683	782.967	1121.65	513.417	817.533	12	12	24	12	11	23	11	11	22	10	12	22	11	12	23	11.2	11.6	22.8	1110.77	535.692	12	12	823.229
5359048	2		1799.75	8	1230.64	1512.48	12	12	1371.56	24	12	1153.95	1211.42	1182.68	1535.6	1457.79	1496.7	1117.2	1744.62	1430.91	1414.56	1125.28	1269.92	1085.31	934.183	1009.75	12	11	23	12	12	24	12	12	24	11	12	23	11	12	23	11.6	11.8	23.4	1084.09	1091.01	12	12	1087.55
5359063	2		946.125	6	1238.59	1038.51	12	12	1138.55	24	12	863.492	664.392	763.942	955.342	751.508	853.425	1067.07	1039.69	1053.38	1170.23	761.433	965.833	1155.27	789.6	972.433	12	12	24	11	11	22	11	11	22	11	12	23	10	12	22	11	11.6	22.6	1078.53	757.858	12	12	918.196
5359069	2		1616.34	6	2016.42	1174.11	11	12	1595.26	23	11.5	1308.14	578.333	943.237	1337.18	840.758	1088.97	903.467	1043.1	973.283	1091.06	594.217	842.638	1229.86	689.983	959.921	12	12	24	12	12	24	10	12	22	12	12	24	12	12	24	11.6	12	23.6	1174.05	917.45	11	12	1045.75
5359073	2		1022.41	6	2134.02	1366.52	8	9	1750.27	17	8.5	1667.16	1107.17	1387.16	1522.26	1086.68	1304.47	1272.6	911.9	1092.25	1240.28	842.683	1041.48	1247.11	727.233	987.171	12	12	24	10	10	20	12	11	23	12	12	24	12	12	24	11.6	11.4	23	1277.75	724.05	12	12	1000.9
5359081	2		1111.99	8	1255.74	867.583	12	12	1061.66	24	12	906.4	619.733	763.067	1054.36	894.75	974.554	1052.82	708.1	880.458	947.675	770.433	859.054	848.825	735.217	792.021	12	12	24	12	12	24	12	12	24	12	12	24	12	12	24	12	12	24	1093.11	907.533	12	12	1000.32
5359123	2		1668.54	8	2029.08	1189.87	12	12	1609.48	24	12	1285.33	1113.64	1199.48	1288.3	906.225	1097.26	1438.81	795.625	1117.22	1248.96	828.958	1038.96	1142.12	829.775	985.95	11	12	23	12	10	22	11	11	22	12	12	24	11	12	23	11.4	11.4	22.8	1522.59	1358.34	12	12	1440.47
5359145	2		705.475	6	1602.35	1133.27	7	10	1367.81	17	8.5	754.542	795.858	775.2	881.5	813.392	847.446	897.1	614.733	755.917	997.617	673.1	835.358	921.092	657.375	789.233	7	10	17	9	9	18	9	8	17	9	9	18	7	7	14	8.2	8.6	16.8	1502.07	740.433	12	11	1121.25
5359209	2		1015.17	8	1094.52	828.583	12	11	961.554	23	11.5	829.25	602.5	715.875	904.2	745.367	824.783	938.7	639.717	789.208	873.983	544.642	709.313	1171.58	660.758	916.171	12	12	24	12	12	24	12	12	24	12	11	23	12	12	24	12	11.8	23.8	931.717	548.642	12	12	740.179
5359212	2		1245.78	8	1272.27	991.775	12	12	1132.02	24	12	941.117	545.392	743.254	968.467	871.458	919.962	1019.15	605.7	812.425	903.325	726.025	814.675	1093.51	920.9	1007.2	12	12	24	12	12	24	12	12	24	12	12	24	11	12	23	11.8	12	23.8	1321.66	780.567	12	12	1051.11
5358654	3	1	3108.15	6	2261.6	1751.54	12	11	2006.57	23	11.5	1677.03	1261.06	1469.04	1230.57	1145.62	1188.09	1346.33	1124.44	1235.39	1076.77	927.65	1002.21	1243.49	1156.83	1200.16	12	11	23	12	12	24	12	12	24	12	12	24	11	12	23	11.8	11.8	23.6	983.025	1571.15	12	12	1277.09
5358664	3	1	1323.24	7	1601.45	2196.07	12	12	1898.76	24	12	1220.87	1168.49	1194.68	890.05	908.167	899.108	969.717	920.167	944.942	1138.88	829.783	984.329	1060.32	923.517	991.917	12	12	24	12	12	24	11	12	23	11	12	23	11	11	22	11.4	11.8	23.2	1176.39	801.908	12	11	989.15
5358695	3	1	3416.28	5	3486.47	1803.43	11	11	2644.95	22	11	3461.13	2137.02	2799.07	1456.2	994.583	1225.39	1856.62	687.192	1271.9	2271.65	997.958	1634.8	1212.77	718.942	965.858	12	12	24	12	12	24	12	11	23	11	11	22	12	12	24	11.8	11.6	23.4	1742.75	1295.27	12	12	1519.01
5358696	3	2	1145.85	8	1179.74	739.017	10	10	959.379	20	10	1633.2	1022.18	1327.69	1674.59	863.483	1269.04	1143.43	601.317	872.375	1439.99	693.825	1066.91	1270.98	523.308	897.146	10	11	21	11	11	22	12	11	23	12	12	24	12	12	24	11.4	11.4	22.8	1595.18	778.5	12	12	1186.84
5358697	3	1	1292.29	8	1532.24	1003.1	12	12	1267.67	24	12	1085.15	746.958	916.054	969.358	720.692	845.025	942.667	859.142	900.904	1027.18	774.75	900.967	1055.7	938.842	997.271	12	11	23	12	12	24	12	12	24	12	11	23	12	11	23	12	11.4	23.4	1164.78	821.783	12	12	993.283
5358713	3	1	1045.5	8	1020.17	987.583	12	11	1003.88	23	11.5	875.833	480	677.917	934.75	792.25	863.5	1091.67	848.5	970.083	761.75	744	752.875	872.333	712.5	792.417	12	12	24	12	12	24	12	11	23	12	12	24	12	12	24	12	11.8	23.8	1006.17	1013.17	12	12	1009.67
5358723	3	2	2023.53	8	1878.01	1666.16	11	11	1772.08	22	11	1663.09	1424.98	1544.04	1768.24	1880.03	1824.14	1827.85	1296.86	1562.35	1933.12	1344.15	1638.64	1620.52	1261.78	1441.15	11	12	23	11	12	23	11	10	21	8	9	17	11	12	23	10.4	11	21.4	1763.73	1890.43	12	11	1827.08
5358733	3	2	1146.49	8	2383.17	2337.21	12	9	2360.19	21	10.5	1945.38	1474.42	1709.9	1996.79	1226.88	1611.84	2010.16	1114.23	1562.2	2054.24	1606.39	1830.32	2539.86	1424.73	1982.3	11	10	21	12	12	24	9	10	19	10	12	22	10	11	21	10.4	11	21.4	1812.06	1183.62	10	11	1497.84
5358765	3	1	1587.57	7	2235.71	1744.87	9	9	1990.29	18	9	1830.53	1635.01	1732.77	1301.62	897.533	1099.58	1037.62	785.367	911.492	1104.77	849.583	977.179	929.817	666.533	798.175	11	7	18	12	12	24	11	12	23	10	10	20	12	12	24	11.2	10.6	21.8	1006.76	817.192	11	12	911.975
5358769	3	1	1283.44	7	1191.63	1341.09	11	12	1266.36	23	11.5	960	893.333	926.667	1017.76	937.75	977.754	1039.85	1255.39	1147.62	1161.53	1139.96	1150.74	1521.98	1250.12	1386.05	12	12	24	12	12	24	11	12	23	12	12	24	12	12	24	11.8	12	23.8	1160.38	1268.98	12	12	1214.68
5358787	3	2	1634.6	7	1499.28	1416.6	11	11	1457.94	22	11	1188.73	852.792	1020.76	1173.42	735.908	954.663	1030.79	723.233	877.013	993.917	747.292	870.604	1243.53	765.1	1004.32	12	11	23	12	9	21	12	11	23	11	11	22	11	12	23	11.6	10.8	22.4	956.55	810.942	12	12	883.746
5358805	3	2	1941.74	8	4632.82	3784.09	12	12	4208.45	24	12	1588.66	844.2	1216.43	1218.61	699.683	959.146	1029.31	924.608	976.958	1294.59	708.442	1001.52	1601.63	957.025	1279.33	12	12	24	12	12	24	12	11	23	12	12	24	12	12	24	12	11.8	23.8	1250.42	1003.01	12	12	1126.71
5358811	3	2	1404.5	3	1348.17	1403.17	8	7	1375.67	15	7.5	1103.75	1052.58	1078.17	1093.42	1036.33	1064.88	1057.42	827.25	942.333	1160.17	1003.83	1082	1289.17	1162.75	1225.96	8	7	15	8	7	15	7	6	13	8	6	14	10	9	19	8.2	7	15.2	943.75	912.833	9	10	928.292
5358813	3	1	1163.69	7	1729.39	1204.99	10	10	1467.19	20	10	1412.15	908.475	1160.31	1278.03	974.425	1126.23	1145.64	847.833	996.738	1302.48	915.033	1108.76	1184.07	780.933	982.5	12	12	24	12	12	24	12	12	24	12	12	24	12	11	23	12	11.8	23.8	1114.5	801.642	11	11	958.071
5358830	3	1	2095.43	8	1459.12	1039.27	12	12	1249.2	24	12	1404.08	874.092	1139.09	975.308	1324.02	1149.67	1286.63	934.033	1110.33	1093.98	1023	1058.49	1494.31	671.775	1083.04	12	12	24	12	10	22	12	12	24	12	12	24	12	12	24	12	11.6	23.6	1286.87	911.492	12	12	1099.18
5358838	3	1	1337.44	8	1248.93	645.308	12	11	947.121	23	11.5	939.325	588.175	763.75	1315.83	704.617	1010.23	1091.33	632.108	861.721	1117.58	591.042	854.313	1149.8	482.2	816	10	10	20	12	10	22	10	11	21	11	11	22	12	10	22	11	10.4	21.4	1161.15	578.133	11	12	869.642
5358846	3	2	820.413	8	898.858	673.375	12	11	786.117	23	11.5	796.525	601.975	699.25	908.217	660.75	784.483	1011.92	661.292	836.604	943.192	601.717	772.454	884.933	765.925	825.429	11	12	23	10	11	21	10	9	19	12	12	24	10	11	21	10.6	11	21.6	957.017	692.55	12	12	824.783
5358871	3	1	990.25	7	991.167	616.417	11	12	803.792	23	11.5	986.75	688	837.375	841.667	546	693.833	876.333	642.5	759.417	1055.25	756.917	906.083	996	673.417	834.708	12	11	23	12	11	23	10	12	22	9	12	21	12	12	24	11	11.6	22.6	1233.25	762.25	12	11	997.75
5358876	3	1	1408.23	8	1882.09	1060.68	12	12	1471.39	24	12	1353.05	773.917	1063.48	1045.34	1006.62	1025.98	1121.56	772.875	947.217	1151.7	859.292	1005.5	957.175	895.05	926.112	12	11	23	12	12	24	12	12	24	12	12	24	12	12	24	12	11.8	23.8	1154.53	1125.89	12	12	1140.21
5358879	3	2	817.475	8	1019.13	646.817	12	12	832.975	24	12	765.383	427.15	596.267	1034.5	603.208	818.854	1051.77	636.908	844.338	832.542	488.242	660.392	1063.02	555.55	809.283	12	12	24	11	10	21	12	11	23	11	12	23	10	12	22	11.2	11.4	22.6	1190.48	581	12	10	885.742
5358906	3	2	1099.36	6	1126.57	880.55	10	11	1003.56	21	10.5	975.392	651.983	813.688	808.8	630.442	719.621	966.725	687.092	826.908	921.25	719.325	820.288	1260.15	664.458	962.304	12	12	24	11	12	23	9	12	21	11	12	23	10	12	22	10.6	12	22.6	1166.98	920.858	11	12	1043.92
5358911	3	2	1228.01	6	1494.19	1004.92	12	12	1249.55	24	12	864.783	739.583	802.183	785.767	733.342	759.554	1214.66	827.4	1021.03	773.892	599.95	686.921	978.05	606.617	792.333	11	10	21	12	10	22	11	12	23	10	12	22	10	12	22	10.8	11.2	22	915.867	761.267	12	12	838.567
5358921	3	2	1339.2	4	1362.43	709.975	12	12	1036.2	24	12	1105.29	707.7	906.496	933.992	636.008	785	1132.36	717.958	925.158	994.442	629.317	811.879	1030.38	673.95	852.167	10	11	21	12	11	23	12	11	23	11	11	22	11	12	23	11.2	11.2	22.4	965.108	984.792	12	11	974.95
5358932	3	2	924	4	1397.58	1253.5	6	4	1325.54	10	5	2129.25	865.083	1497.17	1501.67	794.917	1148.29	1785.58	908.833	1347.21	2125.25	1270.67	1697.96	1413.25	925.583	1169.42	11	11	22	11	11	22	12	12	24	10	12	22	8	11	19	10.4	11.4	21.8	1983.17	1384	12	12	1683.58
5358936	3	1	1867.94	6	1288.47	1179.98	11	11	1234.22	22	11	1453.04	855.075	1154.06	1543.19	947.442	1245.32	1282.34	1136.32	1209.33	1618.41	952.817	1285.61	1197.07	752.125	974.6	10	9	19	12	11	23	12	11	23	12	11	23	12	12	24	11.6	10.8	22.4	1149.08	1327.16	9	9	1238.12
5358942	3	2	962.537	5	829.9	755.75	5	9	792.825	14	7	819.067	654.458	736.763	831.767	633.292	732.529	1024.69	863.608	944.15	955.192	932.025	943.608	1005.57	991.283	998.425	10	12	22	12	10	22	11	11	22	12	12	24	11	11	22	11.2	11.2	22.4	1019.19	1025.48	11	11	1022.33
5358944	3	1	1459.01	7	1197.43	883.117	12	12	1040.27	24	12	947.917	665.408	806.663	1036	706.567	871.283	925.308	569.417	747.363	992.742	686.517	839.629	997.575	676.883	837.229	11	12	23	11	12	23	12	12	24	12	11	23	12	11	23	11.6	11.6	23.2	1043.19	831.592	12	12	937.392
5358946	3	2	1927.01	6	1247.39	1007.87	5	9	1127.63	14	7	1389.59	1245.35	1317.47	1630.06	1553.33	1591.7	1677.03	1170.57	1423.8	1050.92	1106.05	1078.49	1314.07	1670.43	1492.25	6	7	13	8	6	14	12	10	22	9	12	21	9	12	21	8.8	9.4	18.2	1749.32	1037.67	12	12	1393.49
5358949	3	1	3163.84	8	1389.07	1042.85	12	12	1215.96	24	12	986.883	897.242	942.063	1050.92	656.925	853.921	963.858	790.158	877.008	974.1	886.508	930.304	952.675	972.042	962.358	12	12	24	12	12	24	12	12	24	12	12	24	12	12	24	12	12	24	1195.04	1036.4	12	12	1115.72
5358951	3	2	1770.52	8	1600.82	971.075	9	11	1285.95	20	10	1096.61	1139.9	1118.25	1407.39	1070.78	1239.09	1552.97	1003.12	1278.05	1455.67	1221.47	1338.57	1206.5	731.225	968.863	11	12	23	10	10	20	12	11	23	11	12	23	12	11	23	11.2	11.2	22.4	1269.64	961.758	12	12	1115.7
5358959	3	2	1028.38	6	1037.42	1137.92	7	7	1087.67	14	7	981.5	837.667	909.583	881.333	706.25	793.792	760.833	804.5	782.667	838	679.667	758.833	1820.17	2166.42	1993.29	8	9	17	9	9	18	9	9	18	7	11	18	4	5	9	7.4	8.6	16	1332.33	877.25	7	5	1104.79
5358967	3	2	1170.5	7	1301.5	680.417	10	12	990.958	22	11	840.667	520.5	680.583	855.917	831.417	843.667	840.333	656.083	748.208	863.083	665.917	764.5	713.833	630.5	672.167	12	12	24	12	9	21	11	10	21	11	12	23	10	12	22	11.2	11	22.2	979.5	824.167	12	12	901.833
5358971	3	2	1901.75	5	1598.67	785.5	12	12	1192.08	24	12	1035.83	642	838.917	993.417	745.333	869.375	978.75	592	785.375	880.083	613.75	746.917	1259.25	490.083	874.667	12	12	24	12	12	24	12	11	23	11	12	23	12	12	24	11.8	11.8	23.6	1224.75	680.25	12	12	952.5
5358990	3	1	965.387	6	846.925	769.858	9	10	808.392	19	9.5	861.592	737.708	799.65	895.817	630.375	763.096	902.817	754.808	828.813	975.525	838.875	907.2	793.25	748.475	770.863	11	11	22	12	11	23	12	11	23	10	11	21	12	12	24	11.4	11.2	22.6	974.567	812.108	12	12	893.338
5358997	3	2	2803.09	4	1778.07	1072.22	12	11	1425.14	23	11.5	1547.68	1325.18	1436.43	1411.88	1295.61	1353.75	1181.22	1089.02	1135.12	1184.94	1268.24	1226.59	1328.58	1212.04	1270.31	11	12	23	10	12	22	11	11	22	11	10	21	11	12	23	10.8	11.4	22.2	1743.22	1131.57	11	12	1437.39
5358998	3	2	1087.59	3	406.092	426.383	8	4	416.237	12	6	367.275	359.617	363.446	441.042	495.325	468.183	255.4	278.808	267.104	280.667	271.817	276.242	317.733	325.658	321.696	5	5	10	7	5	12	5	3	8	5	4	9	7	7	14	5.8	4.8	10.6	461.092	455.317	6	5	458.204
5359013	3	1	2771.98	7	1736.52	1033.26	6	6	1384.89	12	6	1380.1	868.258	1124.18	1899.99	1291.24	1595.62	1837.16	949.742	1393.45	1860.56	679.967	1270.26	1554.32	650.25	1102.29	6	6	12	12	12	24	12	12	24	12	12	24	12	12	24	10.8	10.8	21.6	1468.65	839.825	12	12	1154.24
5359017	3	1	1668.25	6	1499.42	948.167	12	12	1223.79	24	12	971.25	821.417	896.333	817.083	750.167	783.625	1002.67	719	860.833	1020.67	1036.5	1028.58	959.083	834.083	896.583	12	11	23	12	12	24	12	11	23	11	11	22	12	12	24	11.8	11.4	23.2	855.417	1110.25	12	12	982.833
5359019	3	2	1665.79	2	2773.3	2275.51	7	5	2524.4	12	6	2314	2109.91	2211.95	1890.41	1522.83	1706.62	2413.73	1582.46	1998.1	1808.88	1608.47	1708.68	1772.93	1347.26	1560.09	8	10	18	12	12	24	12	11	23	12	12	24	11	11	22	11	11.2	22.2	1548.87	1628.92	10	11	1588.89
5359022	3	2	1534.94	7	1284.97	972.025	12	12	1128.5	24	12	1124.29	456.5	790.396	1173.59	589.983	881.788	1699.22	606.125	1152.67	1023.92	475.992	749.954	824.558	633.25	728.904	12	12	24	12	11	23	12	11	23	11	11	22	10	12	22	11.4	11.4	22.8	1092.83	676.55	11	12	884.692
5359023	3	2	1549.05	4	1482.42	1649.28	11	11	1565.85	22	11	1200.14	644.158	922.15	904.225	635.208	769.717	987.608	627.083	807.346	952.325	602.55	777.437	1192.88	488.883	840.879	12	11	23	11	11	22	11	12	23	9	11	20	11	11	22	10.8	11.2	22	1204.27	882.633	11	12	1043.45
5359035	3	1	883.125	8	921.5	581.417	12	12	751.458	24	12	743.917	474.833	609.375	844.167	555.667	699.917	899.333	568.083	733.708	960.25	696.167	828.208	776.917	489.5	633.208	12	12	24	12	12	24	10	12	22	10	12	22	11	12	23	11	12	23	1033.67	645.333	12	12	839.5
5359041	3	1	1166.44	8	1097.17	1066.31	10	12	1081.74	22	11	1308.49	774.667	1041.58	963.142	523.75	743.446	942.067	560.817	751.442	1159.37	684.967	922.167	1066.43	488.5	777.467	11	11	22	12	12	24	12	12	24	11	11	22	12	12	24	11.6	11.6	23.2	1000.15	695.683	11	12	847.917
5359050	3	2	2322.79	6	1863.66	1096.18	12	11	1479.92	23	11.5	969.808	726.175	847.992	885.9	779.825	832.862	929.192	732.058	830.625	1013.66	644.658	829.158	974.333	767.008	870.671	11	12	23	11	11	22	11	11	22	11	11	22	9	12	21	10.6	11.4	22	982.883	823.942	12	12	903.413
5359053	3	1	891.375	4	748.658	671.225	7	9	709.942	16	8	843.967	1103.37	973.667	1371.85	830.592	1101.22	1255.48	736.333	995.908	1178.85	875.733	1027.29	1386.66	1044.37	1215.52	11	11	22	12	12	24	12	11	23	11	12	23	12	11	23	11.6	11.4	23	1284.52	1083.71	12	12	1184.11
5359054	3	1	2122.25	8	1383.5	1275.75	12	12	1329.62	24	12	1260.33	946.833	1103.58	1063.42	997	1030.21	1180.17	1051.42	1115.79	1127.5	694.75	911.125	1271	753.917	1012.46	12	12	24	12	11	23	12	12	24	12	12	24	12	12	24	12	11.8	23.8	1283.83	885.5	12	12	1084.67
5359080	3	1	1407.31	6	1312.51	1211.94	10	12	1262.22	22	11	917.008	854.133	885.571	982.492	736.275	859.383	1115.11	881.567	998.337	1021.98	765.95	893.967	887.225	714.192	800.708	12	12	24	12	12	24	11	11	22	12	10	22	12	12	24	11.8	11.4	23.2	1670.51	998.383	12	12	1334.45
5359100	3	2	1797.01	7	1429.21	795.425	12	12	1112.32	24	12	1046.49	653.608	850.05	985.975	800.9	893.438	1056.26	644.075	850.167	965.442	608.917	787.179	1390.7	781.683	1086.19	12	12	24	12	12	24	12	12	24	12	12	24	12	11	23	12	11.8	23.8	1280.44	759.892	12	12	1020.17
5359146	3	2	1049.83	8	1314.85	1099.82	12	11	1207.33	23	11.5	987.4	605.958	796.679	971.633	1061.24	1016.44	1187.54	933.85	1060.7	927.358	687.492	807.425	939.167	892.283	915.725	12	12	24	12	11	23	12	12	24	12	12	24	12	11	23	12	11.6	23.6	1246.13	1117.4	12	12	1181.77
5359169	3	1	2306.87	7	2729.78	1995.7	12	12	2362.74	24	12	1586.74	939.35	1263.05	1573.98	1089.7	1331.84	1080.48	782.45	931.467	873.308	699.117	786.213	922.008	748.492	835.25	11	12	23	12	11	23	12	11	23	11	9	20	9	12	21	11	11	22	1055.92	774.192	12	11	915.054
[truncated: 16 more columns]

## Sheet: Sheet2
group
1	offline
2	online
3	autonomy
choice
1	offline
2	online
sex
1	male
2	female
